# Supplementary material
Source: PubMed Central journal article supplement (PMC7821434)
Supplement: Supp_Fig1.pdf [file Supp_Fig1.pdf]

## Supplementary Data

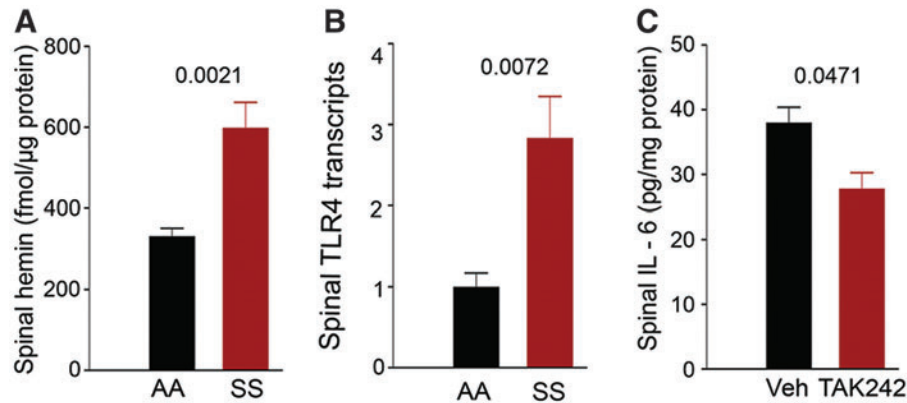

**SUPPLEMENTARY FIG. S1. Spinal heme and TLR4 transcript levels, and TAK242 inhibition of TLR4.** (A) Spinal cords of HbSS-BERK (SS) sickle and HbAA-BERK (AA) control mice were assessed for free heme ( $n=6$ ). (B) TLR4 transcripts (normalized to GAPDH) in the spinal cords of sickle (HbSS,  $7.02 \pm 0.14$  months old,  $n=5$ ) and normal (HbAA,  $7.31 \pm 0.27$  months old,  $n=5$ ) mice. (C) Spinal cords from HbSS-BERK mice treated with TAK242 (1 mg/kg/day, i.v.,  $n=5$ ) or intralipid (Veh,  $n=5$ ) for 5 days were analyzed for IL-6 by ELISA assay. Data are mean  $\pm$  SEM. ELISA, enzyme-linked immunosorbent assay; GAPDH, glyceraldehyde 3-phosphate dehydrogenase; HbA, normal human hemoglobin A (human alpha and beta A globins); HbAA-BERK, transgenic mouse model expressing exclusively normal human HbA developed at Lawrence Berkeley National Laboratory; HbS, hemoglobin containing mutated  $\beta$  globin; HbSS-BERK, transgenic mouse model of SCD expressing exclusively human HbS developed at Lawrence Berkeley National Laboratory; IL-6, interleukin 6; i.v., intravenous; SEM, standard error of the mean; TAK242, resatorvid; selective small molecule inhibitor of TLR4; TLR4, toll-like receptor 4; Veh, vehicle.
