# Supplementary material
Source: PubMed Central journal article supplement (PMC7821434)
Supplement: Supp_Fig2.pdf [file Supp_Fig2.pdf]

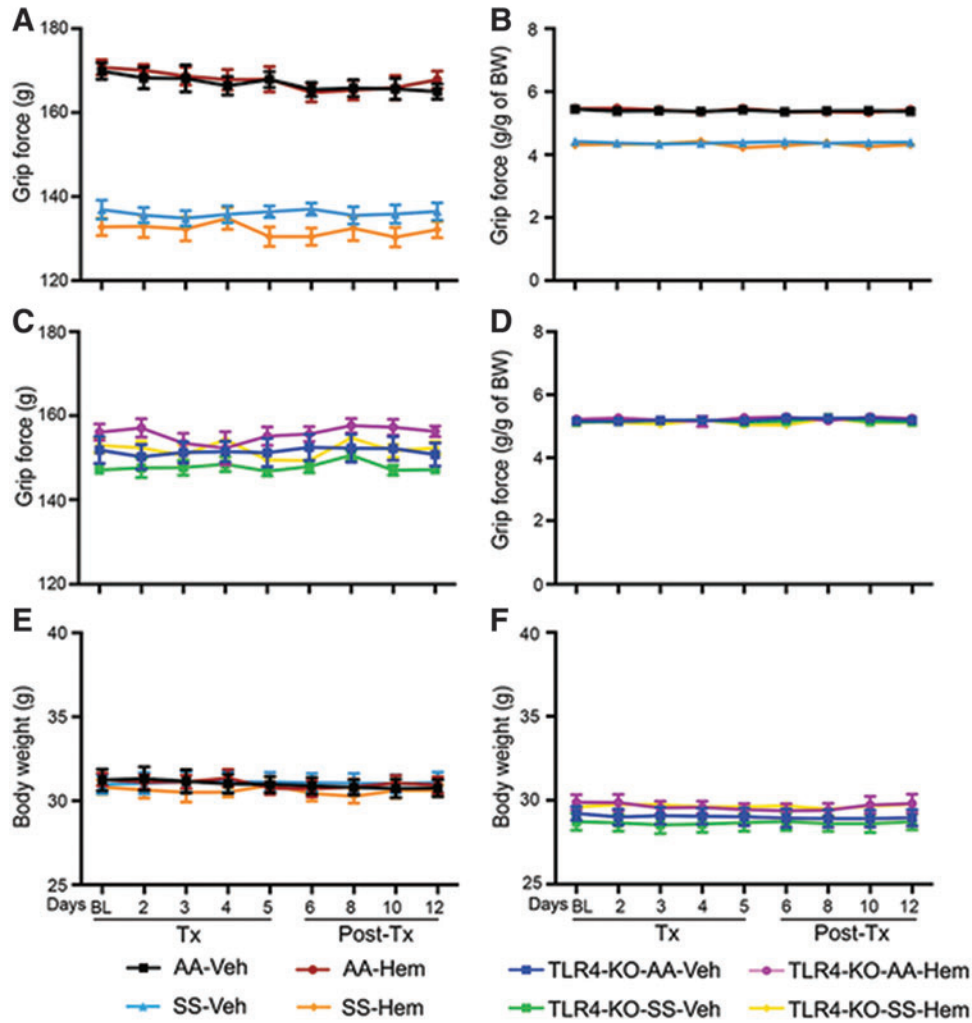

**SUPPLEMENTARY FIG. S2. Effects of hemin on deep tissue hyperalgesia and BW in HbSS-BERK, HbAA-BERK, TLR4-KO HbSS-BERK, and TLR4-KO HbAA-BERK mice.** Animals were treated as described in Supplementary Figure S5A. (A, B) Deep tissue/musculoskeletal hyperalgesia as measured by grip force in HbSS- and HbAA-BERK mice. (C, D) Deep tissue/musculoskeletal hyperalgesia as measured by grip force in TLR4-KO mice. (E, F) BW. Age in months  $\pm$  SEM. HbAA-BERK:  $4.81 \pm 0.06$  (Veh,  $n=5$ );  $4.77 \pm 0.03$  (hemin,  $n=6$ ) and HbSS-BERK:  $4.79 \pm 0.04$  (Veh,  $n=5$ );  $4.75 \pm 0.05$  (hemin,  $n=6$ ). SS-TLR4-KO (Veh,  $5.73 \pm 1.04$ ,  $n=5$ ); SS-TLR4-KO (hemin,  $5.86 \pm 1.04$ ,  $n=5$ ); AA-TLR4-KO (Veh,  $6.04 \pm 0.26$ ,  $n=5$ ); AA-TLR4-KO (hemin,  $5.77 \pm 0.26$ ,  $n=5$ ). Statistical analysis of hemin versus corresponding vehicle at each time-point (two-way ANOVA, Bonferroni) and each time-point versus BL in hemin groups (one-way ANOVA, Bonferroni) showed no significant differences. All data are mean  $\pm$  SEM. AA-TLR4-KO: TLR4 knockout HbAA-BERK; SS-TLR4-KO: TLR4 knockout HbSS-BERK. ANOVA, analysis of variance; BL, baseline; BW, body weight; TLR4-KO, TLR4 knockout (genetic deletion); Tx, treatment.
